# Supplementary material
Source: MDPI journal article supplement (https://www.mdpi.com/2073-4441/13/18/2500)
Supplement: s1 [file s1]

Figure. S1

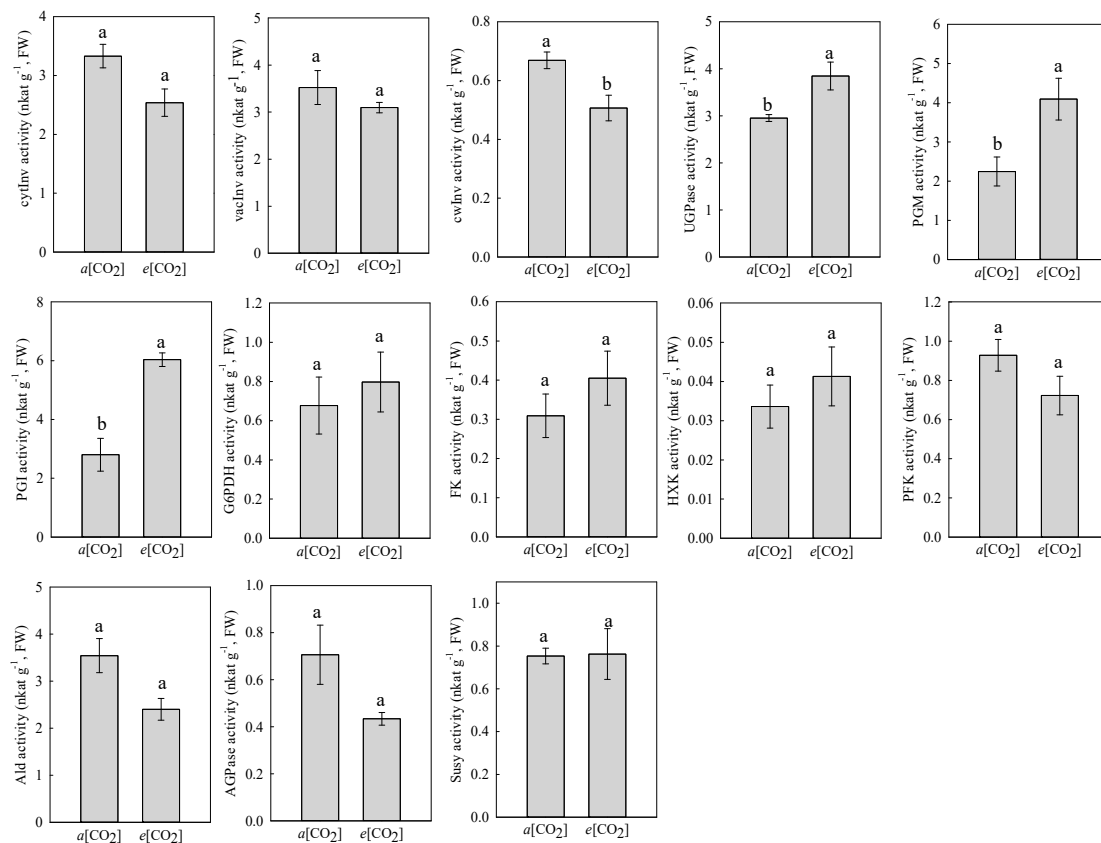

Figure. S1 Specific activities of key carbohydrate metabolism enzyme in leaves of *Phragmites australis* grown under ambient ( $a[CO_2]$ , 400 ppm) and elevated ( $e[CO_2]$ , 800 ppm) atmospheric  $CO_2$  concentrations.
